# Supplementary material
Source: PubMed Central journal article supplement (PMC7196123)
Supplement: 41422_2020_298_MOESM1_ESM.pdf [file 41422_2020_298_MOESM1_ESM.pdf]

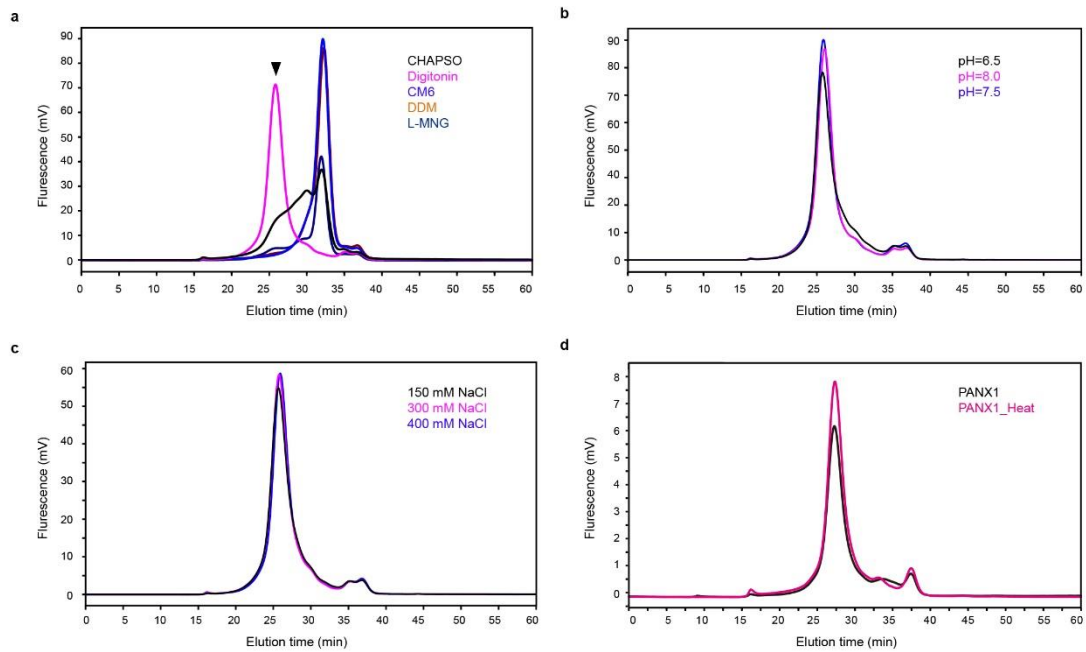

**Supplementary information, Fig. S1 Screening purification conditions for PANX1 channel protein.** (a-c) FSEC screening of detergent (a), pH (b), and salt (c) conditions for PANX1 protein purification. The black triangle in (a) marks the polymeric assembly of the PANX1 channel. CM6 represents 6-cyclohexyl-1-hexyl- $\beta$ -D-maltoside, DDM represents n-dodecyl  $\beta$ -D-maltoside, and L-MNG represents L-maltose-neopentyl glycol. (d) Thermostability test of PANX1 protein solubilized from HEK293S GnT1<sup>-</sup> cells with digitonin.

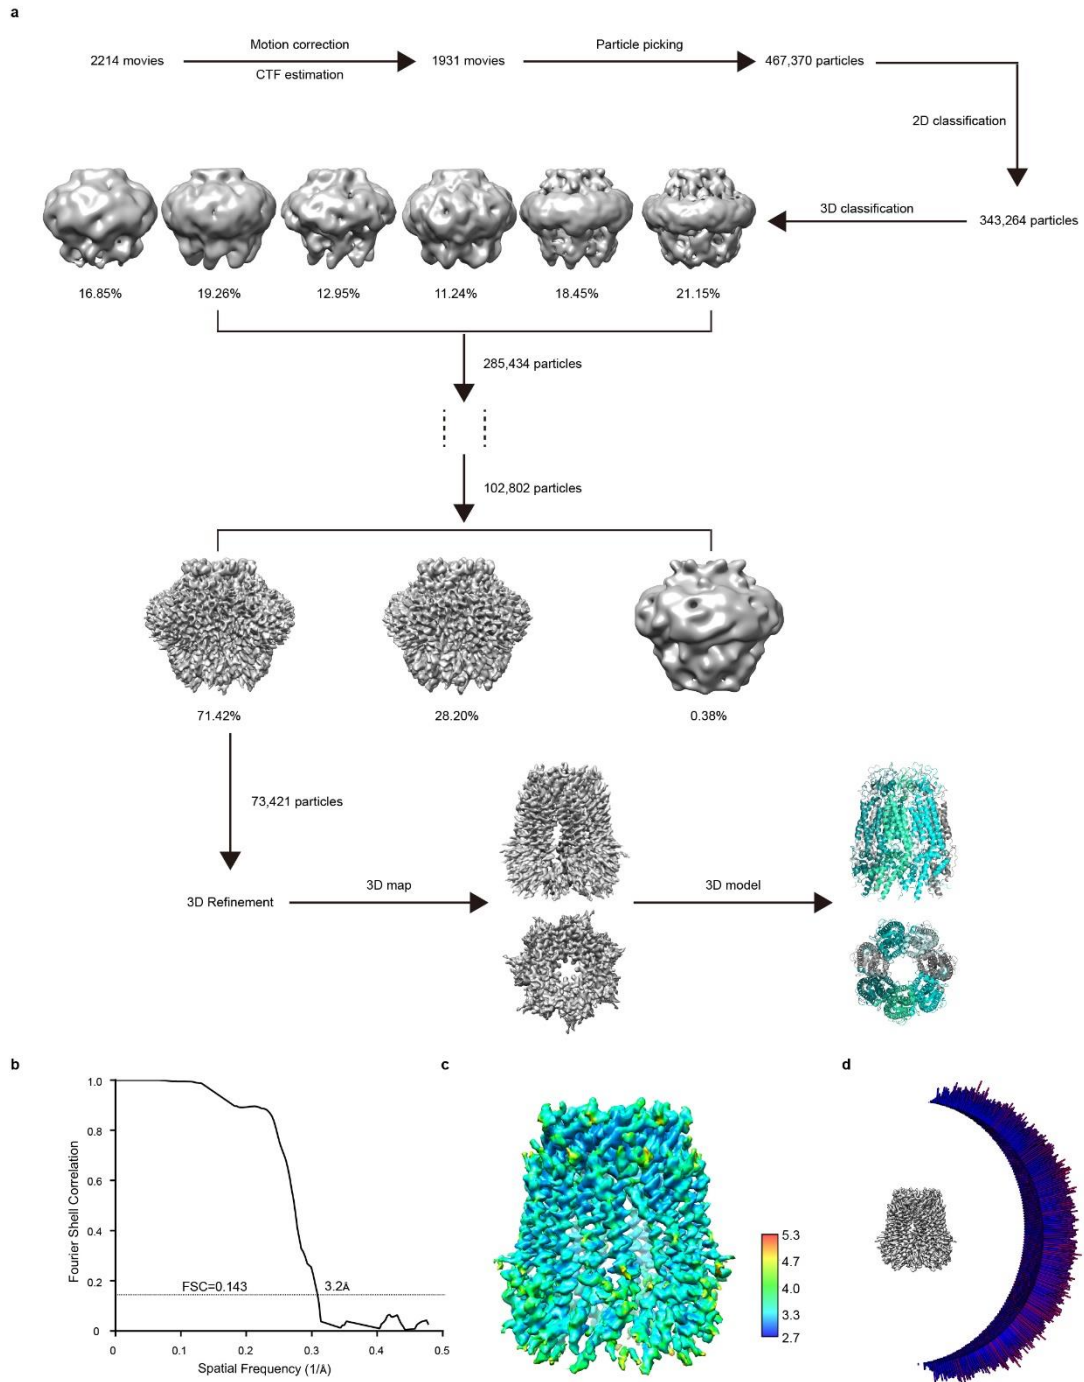

**Supplementary information, Fig. S2 Overview of cryo-EM image processing and 3D reconstruction.** (a) Flowchart of the image processing and model building of the PANX1 channel. (b) Fourier shell correlation (FSC) curve for the resolution estimation. (c) Side view of the cryo-EM density map colored by local resolution estimated by ResMap. (d) Euler angle distribution of the particles used for the 3D reconstruction.

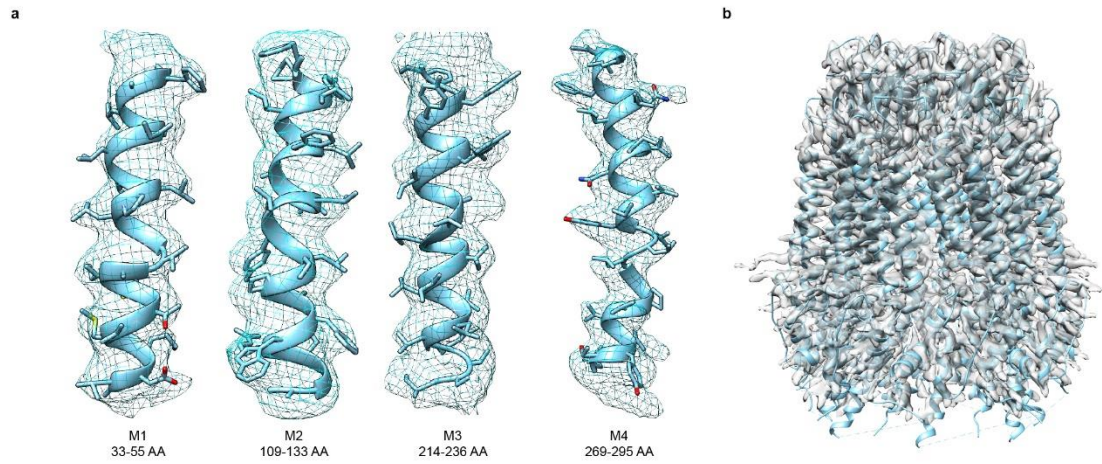

**Supplementary information, Fig. S3 The PANX1 atomic model fit to the cryo-EM density map.** (a) The segmented cryo-EM map (blue mesh) with the atomic model is shown as sticks and ribbons, and the transmembrane helices M1–M4 are identified, which are the most well-defined. (b) The ribbon style model of the PANX1 channel fit to the 3.2 Å density map.



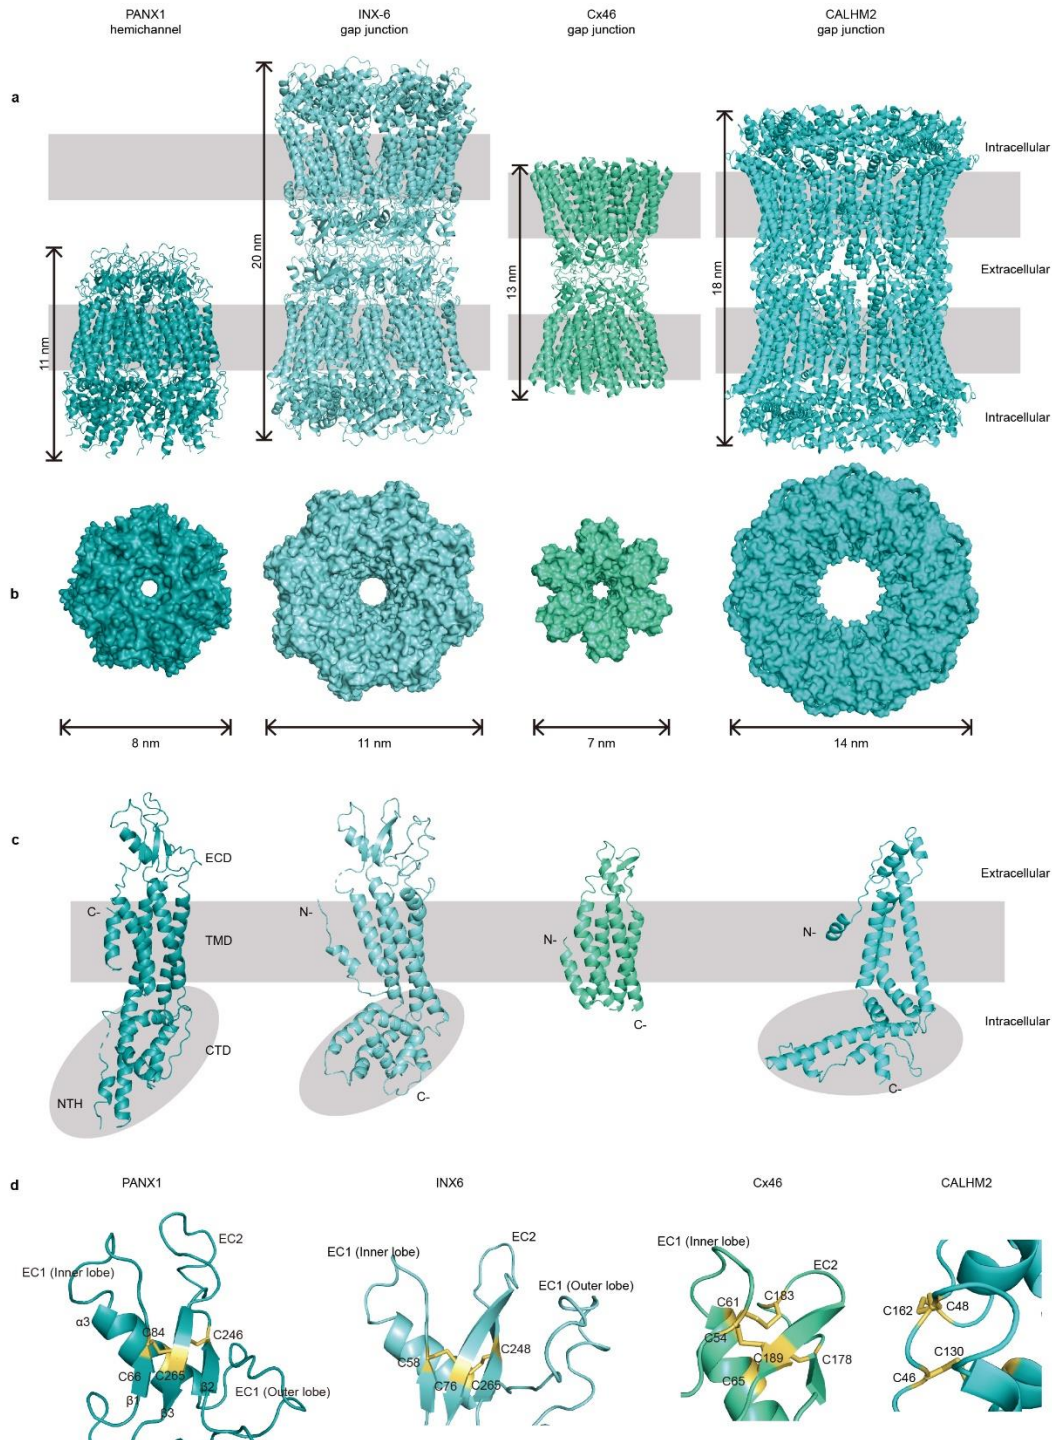

**Supplementary information, Fig. S5 Structural comparisons of PANX1, INX-6, Cx46, and CALHM2 channels.** (a-b) The side-views of cartoon (a) and top-views of surface (b) representations of PANX1, INX-6 (PDB code: 5H1R),<sup>12</sup> Cx46 (PDB code: 6MHQ),<sup>13</sup> and CALHM2 (PDB code: 6UIX)<sup>14</sup> channels are presented. The lengths and widths of each channel and regions corresponding to the extracellular, transmembrane, and cytoplasmic regions are indicated. (c) The protomer structures of the PANX1, INX-6, Cx46, and CALHM2 channels with the N- and C-termini marked. (d) The distributions of the disulfide bonds in the extracellular domain (ECD). The corresponding secondary elements are indicated, and disulfide bonds are labeled in yellow sticks.

**Table S1 Cryo-EM data collection, refinement, and validation statistics**

|                                                     | PANX1      |
|-----------------------------------------------------|------------|
| <b>Data collection and processing</b>               |            |
| Magnification                                       | 81,000     |
| Voltage (kV)                                        | 300        |
| Electron exposure (e <sup>-</sup> /Å <sup>2</sup> ) | 67         |
| Defocus range (μm)                                  | -1.5 to -3 |
| Pixel size (Å)                                      | 1.045      |
| Symmetry imposed                                    | C7         |
| Initial particle images (no.)                       | 467,370    |
| Final particle images (no.)                         | 73,421     |
| Map resolution (Å)                                  | 3.2        |
| Map-sharpening B-factor (Å <sup>2</sup> )           | -103       |
| <b>Refinement</b>                                   |            |
| R.m.s deviations                                    |            |
| Bond lengths (Å)                                    | 0.007      |
| Bond angles (°)                                     | 0.932      |
| Ramachandran plot                                   |            |
| Favored (%)                                         | 94.41      |
| Allowed (%)                                         | 5.59       |
| Outliers (%)                                        | 0          |

1 **Supplementary information**

2

3 **Materials and Methods**

4 **Construct design and FSEC screen**

5 Human *PANX1* coding sequence (NM\_015368.4, residues 1–426, GenBank:  
6 NP\_056183) was cloned into the pEG BacMam vector, followed by a 3C protease  
7 cleavage site, an enhanced red fluorescent protein mRuby, and a Step II affinity tag.  
8 Wild-type human PANX1 was expressed in HEK293S GnTI<sup>-</sup> cells using  
9 Polyethylenimine (PEI) transfection. At 8 hours post-transfection, the medium was  
10 replaced with DMEM supplemented with 10 mM sodium butyrate. Cells were collected  
11 at 36 hours with cold TBS buffer (150 mM NaCl, 20 mM Tris-HCL at pH 8.0) and  
12 centrifuged at 4,000 × *g* for 5 min at 4°C. Cells were resuspended in the solubilization  
13 buffer containing 150 mM NaCl, 20 mM Tris-HCL pH 8.0, 1% digitonin, and protease  
14 inhibitor cocktail (2 mg/mL leupeptin, 2 mM pepstatin A, 0.8 mM aprotinin, and 1 mM  
15 phenylmethylsulfonyl fluoride). For the pH test the buffer was changed to 20 mM MES  
16 at pH 6.5 or HEPES at pH 7.0, for the salt concentration test the NaCl concentration  
17 was changed to 300 mM or 400 mM, and for the detergent test digitonin was changed  
18 to CHAPSO, 6-cyclohexyl-1-hexyl-β-D-maltoside, n-dodecyl β-D-maltoside, or L-  
19 maltose-neopentyl glycol. Samples were rotated at 4°C for 1 hour and then ultra-  
20 centrifuged at 40,000 × *g* for 40 min at 4°C. The supernatants were analyzed by  
21 fluorescence-detection size-exclusion chromatography (FSEC) to screen the  
22 purification conditions. To test the thermostability of PANX1 protein, the samples were

23 split into two equal parts. One part was heated at 50°C for 10 min and then analyzed by  
24 FSEC after ultra-centrifugation.

25

## 26 **Protein expression and grid preparation**

27 Baculovirus containing PANX1 were generated according to the Bac-to-Bac system  
28 protocol (Invitrogen). P2 viruses were used to infect a suspension of HEK293 GnTI<sup>-</sup>  
29 cells at a density of  $3.0 \times 10^6$  cells/mL. At 12 hours post-infection, 10 mM sodium  
30 butyrate was added to the culture medium and the temperature was shifted to 30°C.

31 Cells were collected 60 hours post-infection and subsequently sonicated in TBS buffer  
32 supplemented with protease inhibitor cocktail. The homogenate was centrifuged at  
33  $8,000 \times g$  for 20 min at 4°C to remove the cell debris. The supernatant was further ultra-  
34 centrifuged at  $40,000 \times g$  for 1 hour at 4°C to enrich the membrane fraction. The  
35 membrane pellet was then solubilized with solubilization buffer for 1.5 hour at 4°C.

36 Non-solubilized material was removed by ultracentrifugation ( $40,000 \times g$ , 4°C for 1  
37 hour), and the soluble fraction was bound to the Strep-tactin beads and eluted with TBS  
38 buffer supplemented with 0.25% digitonin and 5 mM desthiobiotin. After 3C protease  
39 digestion overnight at 4°C, the PANX1 protein was further purified by size-exclusion  
40 chromatography (SEC) using a Superose 6 10/300 GL column equilibrated with buffer  
41 consisting of 150 mM NaCl, 0.1% digitonin, and 20 mM Tris-HCl at pH 8.0.

42 Peak fractions collected from SEC were concentrated to 3.5–4.0 mg/mL and then ultra-  
43 centrifuged at  $40,000 \times g$  for 1 hour at 4°C. A total of a 3 µL sample was applied to a  
44 glow-discharged Quantifoil holey carbon grid (gold, 1.2–1.3 µm/hole, 200 mesh),



45 blotted using a Vitrobot (FEI) with a 3 s blotting time at 100% humidity and 18°C, and  
46 then plunge-frozen in liquid ethane cooled by liquid nitrogen. The frozen grids were  
47 carefully transferred and stored in liquid nitrogen until Cryo-EM image collection.

48

#### 49 **Data collection and image processing**

50 A total of 2,214 movies were collected on a Titan Krios (FEI) operated at 300 kV  
51 equipped with a Gatan image filter (operated with a slit width of 20 eV) (GIF), mounted  
52 with a K3 Summit detector (Gatan, Inc.). SerialEM<sup>1</sup> was used to automatically acquire  
53 micrographs in super-resolution counting mode at a pixel size of 0.5225 Å and with  
54 nominal defocus values ranging from -1.5 to -3 µm. Movies with 36 frames each were  
55 collected at a dose of 25 electrons per pixel per second over an exposure time of 3 s,  
56 resulting in a total dose of 67 e<sup>-</sup>/Å<sup>2</sup> on the specimen.

57 All 36 movie frames in each stack were aligned and dose weighted using MotionCor2,<sup>2</sup>  
58 which generated 2-fold binned images to a pixel size of 1.045 Å/pixel. CTFFIND 4.1<sup>3</sup>  
59 was used for estimating the defocus values and astigmatism parameters of the contrast  
60 transfer function (CTF). A total of 1931 micrographs were chosen for further processing.  
61 cisTEM<sup>4</sup> was initially used for image processing. In order to get an idea of the subunit  
62 organization, reference-free two-dimensional (2D) classifications were performed.  
63 RELION 3.0 was used for further data processing.

64 About 3,000 particles were initially picked by ManualPick from selected micrographs  
65 and subjected to 2D classification. The reference-free 2D class averages selected from  
66 manually picking particles were used as templates for automated particle picking,

67 which yielded a total of 467,370 particles. These particles were extracted with a box  
68 size of  $320 \times 320$  pixels and processed with rounds of iterative 2D and 3D  
69 classifications. 3D classification was performed using an initial model generated *de*  
70 *novo* from 2D particles by using the stochastic gradient descent (SGD) algorithm, low-  
71 pass filtered to 30 Å. In the 2D class averages or 3D class reconstructions, those  
72 particles without high-resolution and interpretable features were considered as “bad  
73 class” and were discarded. C7 symmetry was applied, which was first compared with  
74 C1 and showed better map features. Finally, 73,421 particles from a 3D class showing  
75 good secondary structural features in the transmembrane domain were selected for  
76 further 3D refinement. Post-processing yielded a map with an overall resolution of 3.2  
77 Å according to the Fourier shell correlation (FSC) equal to 0.143 criterion.<sup>5</sup> The local  
78 resolution was calculated by ResMap.<sup>6</sup> The masks used for the FSC calculations were  
79 produced using `relion_mask_create` in RELION 3.0.

80

### 81 **Model building and refinement**

82 The PANX1 protein structure was modeled *de novo*. Much of the side-chain density  
83 information was clearly visualized in the map, which made the unambiguous building  
84 and refining of the model possible. Coot was used to build the atomic model,<sup>7</sup> which  
85 was then refined via the `real_space_refinement` feature in Phenix.<sup>8</sup> Pore radii were  
86 measured by the program HOLE.<sup>9</sup> All of the figures were created using USCF  
87 Chimera<sup>10</sup> or PyMOL 2.3.2.

88

89 **Sequence analysis and alignment of the Pannexin family**

90 Homologous sequences of the human Pannexin family (PANX1, PANX2 and PANX3)  
91 were aligned by ClustalW (<https://www.ebi.ac.uk/Tools/msa/clustalw2/>) and displayed  
92 using Adobe Illustrator.

93

94 **Mouse oocyte collection, cRNA transcription, and microinjection**

95 GV oocytes were acquired from 6–8-week-old female ICR mice (Beijing Vital River  
96 Laboratory Animal Technology Co.) by puncturing the antral follicles with a fine needle  
97 under a dissecting microscope. GV oocytes were cultured in M2 medium (Sigma-  
98 Aldrich) supplemented with 10% FBS.

99 The full-length of human *PANX1* gene coding sequence following a stop codon  
100 (NM\_015368.4) was amplified and cloned into the pCMV6-entry vector to express an  
101 untagged protein. The p.W74A mutation in *PANX1* was introduced by using the KOD-  
102 Plus-Mutagenesis Kit (Toyobo Life Science) following the manufacturer's instructions.  
103 WT and mutant PANX1 were linearized by *AgeI* restriction enzyme (R0552S, New  
104 England Biolabs) for 3 hours at 37 °C. A total of 1 µg purified linearized DNA was used  
105 as a template to transcribe the cRNA of *PANX1* using the HiScribe T7 ARCA mRNA  
106 Kit (E2060S, New England BioLabs), followed by DNase I treatment and  
107 polyadenylate tailing, and the cRNA was further purified using the RNeasy MinElute  
108 Cleanup Kit (74204, Qiagen).

109 About 5–10 pL (1000 ng/mL) of WT or mutant *PANX1* cRNA was microinjected into  
110 the cytoplasm of GV oocytes using a Leica Hoffman microscope (LSM6000) equipped

111 with a TransferMan NK2 micromanipulator and InjectMan NI2 (Eppendorf). The  
112 injected GV oocytes were matured in M2 medium (Sigma-Aldrich) supplemented with  
113 10% FBS for 12 hours at 37°C with 5% CO<sub>2</sub>. Mature oocytes were gathered and  
114 fertilized with capacitated sperm. All mouse experimental protocols were ethically  
115 reviewed by the Shanghai Medical College of Fudan University.

116

### 117 **Two-electrode voltage-clamp recording**

118 A total of 6 ng of WT or mutant *PANX1* cRNA was injected into *Xenopus laevis* oocytes.  
119 Two-electrode voltage-clamp (TEVC) was performed 48 hours later in the standard  
120 external solution that included 2 mM CaCl<sub>2</sub>, 2 mM KCl, 1 mM MgCl<sub>2</sub>, 90 mM NaCl,  
121 and 5 mM HEPES with or without 10 mM CBX (Sigma-Aldrich). The pH was adjusted  
122 with KOH to 7.4. Initially, the membrane potential was held at -60 mV for 100 ms,  
123 then changed from -100 to +60 mV in 2 s ramps with 20 mV per step. Data were  
124 gathered and analyzed using a pClamp10 (Molecular Devices). Statistical analyses  
125 were carried in GraphPad Prism, and data are shown as means ± SD with a *p*-value  
126 below 0.05 being considered significant.

127

### 128 **ATP release measurements**

129 HEK293S GnTI<sup>-</sup> cells were plated in 24-well plates and transfected with WT or mutant  
130 PANX1 plasmid at 80–90% confluence. The measurement of ATP release was  
131 conducted using an ATP Bioluminescent Assay Kit (Sigma-Aldrich) according to the  
132 manual and the method that Lohman et al. used in 2012.<sup>11</sup> Briefly, 30–36 hours after

133 transfection, the medium was removed from each well and fresh medium was added. A  
134 total volume of 300  $\mu$ M ARL 67156 (Sigma-Aldrich) was added for 30 min at 37°C to  
135 inhibit the ectonucleotidases. HEK293S GnTII<sup>-</sup> cells were stimulated by 100 mM KCl  
136 for 1 min, and following stimulation of the cells 100  $\mu$ L of the supernatant was collected  
137 and immediately placed on ice. All samples were then centrifuged at 5000  $\times$  g for 2 min  
138 and transferred to a new tube. A mixture of 50  $\mu$ L of each sample and 50  $\mu$ L of luciferin-  
139 luciferase was assayed using a luminometer (Luminoskan TL Plus, Thermo  
140 LabSystems). The relative ATP concentration was displayed as a ratio of all values with  
141 respect to the control group.

142

#### 143 **Statistical analysis**

144 GraphPad was used to perform the statistical analyses. Student's *t*-tests and one-way  
145 ANOVA followed by Tukey's post-hoc test was used for two experimental groups and  
146 more than two groups, respectively. P-values less than 0.05 were considered significant.

147

148

149

150

151

152

153

154

155 **References**

- 156 1. Mastronarde, D. N., Automated electron microscope tomography using robust  
157 prediction of specimen movements. *J. Struct. Biol.* **152**, 36-51 (2005).
- 158 2. Zheng, S. Q. et al., MotionCor2: anisotropic correction of beam-induced motion  
159 for improved cryo-electron microscopy. *Nat. Methods* **14**, 331-332 (2017).
- 160 3. Rohou, A. & Grigorieff, N., CTFFIND4: Fast and accurate defocus estimation  
161 from electron micrographs. *J. Struct. Biol.* **192**, 216-221 (2015).
- 162 4. Grant, T., Rohou, A. & Grigorieff, N., cisTEM, user-friendly software for single-  
163 particle image processing. *Elife* **7**, (2018).
- 164 5. Henderson, R. et al., Outcome of the first electron microscopy validation task force  
165 meeting. *Structure* **20**, 205-214 (2012).
- 166 6. Kucukelbir, A., Sigworth, F. J. & Tagare, H. D., Quantifying the local resolution  
167 of cryo-EM density maps. *Nat. Methods* **11**, 63-65 (2014).
- 168 7. Emsley, P., Lohkamp, B., Scott, W. G. & Cowtan, K., Features and development  
169 of Coot. *Acta Crystallogr D Biol Crystallogr* **66**, 486-501 (2010).
- 170 8. Adams, P. D. et al., PHENIX: a comprehensive Python-based system for  
171 macromolecular structure solution. *Acta Crystallogr D Biol Crystallogr* **66**, 213-221  
172 (2010).
- 173 9. Smart, O. S., Neduelil, J. G., Wang, X., Wallace, B. A. & Sansom, M. S., HOLE:  
174 a program for the analysis of the pore dimensions of ion channel structural models. *J*  
175 *Mol Graph* **14**, 354-360, 376 (1996).
- 176 10. Pettersen, E. F. et al., UCSF Chimera--a visualization system for exploratory

- 177 research and analysis. *J. Comput. Chem.* **25**, 1605-1612 (2004).
- 178 11. Lohman, A. W. et al., S-nitrosylation inhibits pannexin 1 channel function. *J. Biol.*  
179 *Chem.* **287**, 39602-39612 (2012).
- 180 12. Oshima, A., Tani, K. & Fujiyoshi, Y., Atomic structure of the innexin-6 gap  
181 junction channel determined by cryo-EM. *Nat Commun* **7**, 13681 (2016).
- 182 13. Myers, J. B. et al., Structure of native lens connexin 46/50 intercellular channels  
183 by cryo-EM. *Nature* **564**, 372-377 (2018).
- 184 14. Choi, W., Clemente, N., Sun, W., Du J & Lu, W., The structures and gating  
185 mechanism of human calcium homeostasis modulator 2. *Nature* **576**, 163-167 (2019).

186

187

188

189

190

191

192

193

194

195

196

197

198
